# Supplementary material for: Resveratrol Protects against Restraint Stress Effects on Stomach and Spleen in Adult Male Mice
Source: MDPI journal article supplement (doi:10.3390/ani9100736), 2019-09-27
Supplement: s1 [file s1]

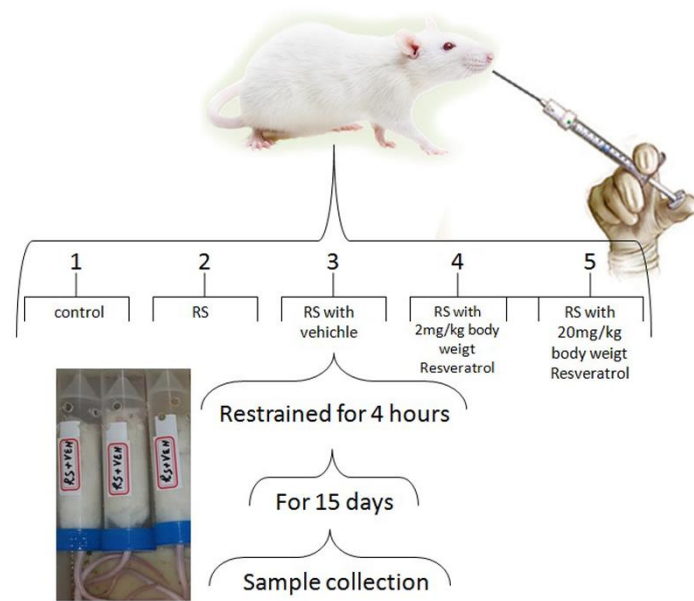

**Figure 1.** The supplementary figure showed the brief experimental design including the restraint stress protocol for 4 hours daily for 15 consecutive days.
